# Supplementary material for: Cooperative light-induced breathing of soft porous crystals via azobenzene buckling
Source: PubMed Central journal article supplement (PMC9005654; doi:10.1038/s41467-022-29149-z), 2022-04-12
Supplement: 41467_2022_29149_MOESM2_ESM.pdf [file 41467_2022_29149_MOESM2_ESM.pdf]

## **Description of Additional Supplementary Files**

**Supplementary Movie 1:** Buckling of Azobenzene

**Supplementary Movie 2:** Contraction of DUT-163 via Buckling

**Supplementary Movie 3:** *E-Z* isomerization of Azobenzene

**Supplementary Movie 4:** Contraction of DUT-163 via *E-Z* isomerization
